# Supplementary material
Source: ML conference proceedings conference paper supplement (https://openaccess.thecvf.com/content/WACV2025/html/Flanagan_Moment_of_Untruth_WACV_2025_paper.html)
Supplement: Supplementary file 1 [file Flanagan_Moment_of_Untruth_WACV_2025_supplemental.pdf]

# Supplementary - Moment of Truth: Dealing with Negative Queries in Video Moment Retrieval

Kevin Flanagan  
University of Bristol

kevin.flanagan@bristol.ac.uk

Dima Damen  
University of Bristol

dima.damen@bristol.ac.uk

Michael Wray  
University of Bristol

michael.wray@bristol.ac.uk

In this supplementary, we provide more information about the dataset creation in Sec. 1, describing the process of generating the out-of-domain negative queries using LLMs and demonstrating our prompts and categories as well as details about the Negative-Aware Video Moment Retrieval dataset. We display full results for SVMs trained on output saliency scores for all three models (UniVTG [3], CG-DETR [4], QD-DETR [5]) in Sec. 2. We expand on the adjustments made to the losses for UniVTG-NA and detail the QD-DETR and CG-DETR implementations in Sec. 3. We demonstrate the out-of-domain generalisability of UniVTG-NA in Sec. 4. We further motivate the need for negative-aware methods in video moment retrieval by displaying results with negative queries from UniMD [6] in Sec. 5. Finally, we show more qualitative results from UniVTG-NA on QVHighlights and Charades-STA in Sec. 6.

## 1. Dataset Information

### 1.1. Out-of-Domain Negative Query Generation

As mentioned in the main paper, the out-of-domain negative query sentences were generated using a large language model (LLM). Four broad scenarios were used as query topics, these were “competitive sport”, “animal behaviour”, “physics laboratory”, and “mathematics class”. In Table 1, the subtopics for each of these topics are listed. The prompt and specific LLM used for each topic is also displayed. Prompts were empirically chosen to ensure the quality and diversity of the generated sentences. For example, for the “animal behaviour” topic, it was found that using scientific names improved upon these aspects, hence most of the subtopics are scientific names. The four scenarios were chosen as they represent scenarios which are unlikely to be present within the QVHighlights and Charades-STA datasets, which cover news, vlogs and household actions. The choice of 4 broad scenarios helps to ensure that the OOD negatives remain OOD and do not accidentally produce false negatives. By using prompts specifically describing the actions as short, unique and varied, we are able to get a wider range of sentences without the language be-

coming too decorative. Sample sentences from each scenario are displayed in Table 2. We use the same set of OOD Negatives for both QVHighlights [2] and Charades-STA [1].

### 1.2. Negative Aware Dataset Details

Table 3 displays the number of positive and negative queries used during training/evaluation of the models. For Charades-STA, where there are fewer negative queries than positive for out-of-domain, the negative queries are assigned to multiple videos. This still produces a distinct signal as each video-sentence pair offers a different semantic relationship.

## 2. SVM Trained on Saliency Scores

We train an SVM on the outputted positive and negative query saliency scores from UniVTG [3], QD-DETR [5] and CG-DETR [4] for the QVHighlights and Charades-STA datasets. This is to quantify how separable positive and negative queries are when the relationship between them is modelled using saliency outputs from the base models, without any explicit training for negative rejection. Results are displayed in Table 4.

The SVM results on QVHighlights show high rejection accuracy at the cost of decreased  $R1@\theta$  scores. In the case of QD-DETR, these are significantly decreased. The Charades-STA results show reasonable rejection accuracy at significant cost to the  $R1@\theta$  scores for CG-DETR and QD-DETR, while UniVTG fails to achieve high rejection accuracy but has better  $R1@\theta$  scores. Overall these results display the limitations of using the saliency outputs from the base models alone for combined moment retrieval and negative rejection, particularly on datasets without ground-truth saliency scores such as Charades-STA. It further motivates the need to train explicitly for negative rejection.

| Topic     | Competitive Sport                                       |                  | Animal Behaviour                                                                           |                 |              | Physics Laboratory                                                                                              | Mathematics Class                                                                                                 |
|-----------|---------------------------------------------------------|------------------|--------------------------------------------------------------------------------------------|-----------------|--------------|-----------------------------------------------------------------------------------------------------------------|-------------------------------------------------------------------------------------------------------------------|
| Model     | Chat-GPT (GPT-4o)                                       |                  | Claude 3 Opus                                                                              |                 |              | Claude 3 Opus                                                                                                   | Claude 3 Opus                                                                                                     |
| Prompt    | Generate $X$ sentences describing actions in <subtopic> |                  | Generate $X$ unique and varied short sentences of visual actions carried out by <subtopic> |                 |              | Generate $X$ unique and varied sentences of visual actions carried out by a person working in a <subtopic> lab. | Generate $X$ unique and varied sentences of visual actions carried out by a person working in a <subtopic> class. |
| Subtopics | american football                                       | archery          | accipitriformes                                                                            | agnatha         | alcidae      | acoustics                                                                                                       | algebra                                                                                                           |
|           | athletics field events                                  | badminton        | anatidae                                                                                   | anguilliformes  | annelids     | atmospheric physics                                                                                             | applied mathematics                                                                                               |
|           | baseball                                                | boxing           | anura                                                                                      | big cats        | bivalves     | biophysics                                                                                                      | calculus                                                                                                          |
|           | cricket                                                 | cyclng           | bovidae                                                                                    | camelid         | canidae      | chemical physics                                                                                                | combinatorics                                                                                                     |
|           | darts                                                   | fencing          | cephalopods                                                                                | cervidae        | chelicerata  | classical mechanics                                                                                             | computational maths                                                                                               |
|           | field hockey                                            | golf             | chiroptera                                                                                 | chondrichthyes  | cnidaria     | condensed matter physics                                                                                        | geometry                                                                                                          |
|           | gymnastics                                              | ice hockey       | crocodilia                                                                                 | decapods        | echinoderms  | cosmology                                                                                                       | graph theory                                                                                                      |
|           | ice skating                                             | kickboxing       | elasmobranchs                                                                              | gastropods      | giraffidae   | electromagnetism                                                                                                | number theory                                                                                                     |
|           | lacrosse                                                | rowing           | hymenoptera                                                                                | insects         | lagomorphs   | electronics                                                                                                     | probability                                                                                                       |
|           | rugby                                                   | running          | lepidoptera                                                                                | lizards         | marsupials   | fluid dynamics                                                                                                  | statistics                                                                                                        |
|           | skateboarding                                           | skiing           | monotremes                                                                                 | mustelids       | osteichthyes | geophysics                                                                                                      |                                                                                                                   |
|           | snooker                                                 | snowboarding     | pinnipeds                                                                                  | platyhelminthes | porifera     | medical physics                                                                                                 |                                                                                                                   |
|           | soccer                                                  | squash           | primates                                                                                   | proboscidea     | ratites      | optical physics                                                                                                 |                                                                                                                   |
|           | swimming                                                | table tennis     | rodents                                                                                    | serpentes       | spheniscidae | particle physics                                                                                                |                                                                                                                   |
|           | tennis                                                  | ultimate frisbee | stomatopods                                                                                | strigiformes    | suina        | quantum mechanics                                                                                               |                                                                                                                   |
|           | water polo                                              |                  | talpidae                                                                                   | testudines      | urodela      | thermodynamics                                                                                                  |                                                                                                                   |
|           |                                                         |                  | ursidae                                                                                    | wading birds    |              |                                                                                                                 |                                                                                                                   |

Table 1. List of topics and subtopics used for out-of-domain negative generation, along with the prompts and LLMs used.  $X$  represents the number of sentences requested which varied from 50 to 100.

### 3. Model Details

#### 3.1. UniVTG-NA

For UniVTG-NA, the input to the classification head is a direct sum of the indicator scores and saliency scores. *i.e.*  $g_i = f_i + s_i$  where  $g_i$  is the classification head input at index  $i$ .

**Loss Adaptations.** We specify the adjustments made to the losses for the UniVTG-NA model from UniVTG [3]. Aside from the boundary prediction losses being set to 0 for the negative queries, the saliency losses are also adjusted. UniVTG uses a saliency loss  $\mathcal{L}_s$  which is a weighted summation of inter-video and intra-video contrastive losses. It is not possible to use the contrastive saliency loss with negative queries. Therefore, for negative queries the saliency loss is defined as a loss applied directly on the cosine similarity between the video clip  $\mathbf{v}_i$ , and sentence features  $\mathbf{S}$ , with  $\lambda_s^-$  as the loss weighting.

$$\mathcal{L}_s^- = \lambda_s^- \cos(\mathbf{v}_i, \mathbf{S}) := \lambda_s^- \frac{\mathbf{v}_i^T \mathbf{S}}{\|\mathbf{v}_i\|_2 \|\mathbf{S}\|_2} \quad (1)$$

This is done as the saliency scores are computed via cosine similarity between sentence and video clip features for UniVTG, so achieves our principle of designing the saliency loss for negatives such that it pushes the saliency scores lower. Furthermore, for UniVTG-NA’s foreground matching loss with negative queries,  $\mathcal{L}_f^- = \mathcal{L}_f$  as no adjustments are made to the matching loss, which is a BCE loss on the individual indicator scores. This already achieves the aim of pushing the indicator scores lower.

#### 3.2. QD-DETR-NA & CG-DETR

Negative-aware versions of QD-DETR and CG-DETR were also trained to evaluate the proposed method on other models. The details of the QD-DETR and CG-DETR implementation are as follows: Given the indicator score outputs  $\{\tilde{f}_1, \dots, \tilde{f}_M\}$  and saliency score outputs  $\{\tilde{s}_1, \dots, \tilde{s}_{L_v}\}$ , the input to the classification head is a concatenation  $g = \{\tilde{s}_1, \dots, \tilde{s}_{L_v}, \tilde{f}_1, \dots, \tilde{f}_M\} \in \mathbb{R}^{(L_v+M)}$ , where  $L_v$  is the number of video clip features and  $M$  is the number of moment queries. This implementation is represented in Figure 1. This is chosen as opposed to a summation because QD-DETR/CG-DETR use moment queries to generate the moment candidates rather than just the text-attended video clip representations from the encoder. In this case, there is not a one-to-one correspondence with the saliency scores, *i.e.*  $L_v \neq M$ .

As with UniVTG, the boundary losses were set to 0 and the foreground matching loss was retained for the negative queries. For both methods, the saliency loss has three components, two of which are contrastive and are therefore not feasible for negative queries. The remaining loss works to reduce the negative query saliency scores, thus achieving the principle aim of the negative query saliency loss. Therefore it is retained as the sole loss for negative queries. It is shown for a saliency score output  $s_i$  with loss weighting  $\lambda_s^-$  below.

$$\mathcal{L}_s^- = \lambda_s^- (-\log(1 - s_i)) \quad (2)$$

| Competitive Sport                                                                                                                                                                                                                                                                                                                                                                                                                                                                                                                                                                                                                                                                                                                                                                                                                                                                                                                                                                                                                                                                                                                                                                                                                                                                                                                                                                                                                                                                                                                                                                                                                                                                                                                                                                                                                                                                                                                                                    | Animal Behaviour                                                                                                                                                                                                                                                                                                                                                                                                                                                                                                                                                                                                                                                                                                                                                                                                                                                                                                                                                                                                                                                                                                                                                                                                                                                                                                                                                                                                                                                                                                                                                                                                                                                                                                                                                                                                                                                                                                                                                                                                                                                             |
|----------------------------------------------------------------------------------------------------------------------------------------------------------------------------------------------------------------------------------------------------------------------------------------------------------------------------------------------------------------------------------------------------------------------------------------------------------------------------------------------------------------------------------------------------------------------------------------------------------------------------------------------------------------------------------------------------------------------------------------------------------------------------------------------------------------------------------------------------------------------------------------------------------------------------------------------------------------------------------------------------------------------------------------------------------------------------------------------------------------------------------------------------------------------------------------------------------------------------------------------------------------------------------------------------------------------------------------------------------------------------------------------------------------------------------------------------------------------------------------------------------------------------------------------------------------------------------------------------------------------------------------------------------------------------------------------------------------------------------------------------------------------------------------------------------------------------------------------------------------------------------------------------------------------------------------------------------------------|------------------------------------------------------------------------------------------------------------------------------------------------------------------------------------------------------------------------------------------------------------------------------------------------------------------------------------------------------------------------------------------------------------------------------------------------------------------------------------------------------------------------------------------------------------------------------------------------------------------------------------------------------------------------------------------------------------------------------------------------------------------------------------------------------------------------------------------------------------------------------------------------------------------------------------------------------------------------------------------------------------------------------------------------------------------------------------------------------------------------------------------------------------------------------------------------------------------------------------------------------------------------------------------------------------------------------------------------------------------------------------------------------------------------------------------------------------------------------------------------------------------------------------------------------------------------------------------------------------------------------------------------------------------------------------------------------------------------------------------------------------------------------------------------------------------------------------------------------------------------------------------------------------------------------------------------------------------------------------------------------------------------------------------------------------------------------|
| <p>The outfielder throws to home plate</p> <p>The opponent hits a drop shot followed by a lob</p> <p>The striker heads the ball into the net</p> <p>The punter pins the opposing team deep in their own territory with a well-placed kick</p> <p>The player executes a deceptive backhand drop shot</p> <p>The opponent flicks a shuttlecock deep into the backcourt</p> <p>The goalie makes a sprawling save</p> <p>The player switches to a colored ball after potting all reds</p> <p>The opponent covers up, absorbing the blows</p> <p>The center offloads the ball to a teammate before being tackled</p> <p>The flanker disrupts the opposing team’s Maul, forcing a turnover</p> <p>The rowers maintain their balance as the boat rocks gently on the water</p> <p>The rowers return to the dock and disembark from the boat</p> <p>The archer aims downrange, focusing on the target</p> <p>The skater lands a double axel with precision</p> <p>The swimmer’s streamline position reduces resistance through the water</p> <p>Skiers maintain a tight tuck to minimize drag</p> <p>The athlete lands on the mat on the other side of the bar</p> <p>The skater executes a jump combination, linking jumps of different rotations</p> <p>The gymnast tumbles with precision on the floor exercise mat</p>                                                                                                                                                                                                                                                                                                                                                                                                                                                                                                                                                                                                                                                   | <p>An osprey dives into the water, snatching a fish with its talons</p> <p>A northern harrier glides low over a meadow, searching for small mammals.</p> <p>An ovambo sparrowhawk sits near its nest, guarding its eggs.</p> <p>A slender-billed kite hunts for insects over an African grassland</p> <p>A white-backed vulture strips meat from a carcass with its strong beak</p> <p>A lamprey swam in a figure-eight pattern, leaving pheromone trails for potential mates</p> <p>A group of lamprey larvae anchored themselves to rocks, facing into the current</p> <p>A bronze eel lay coiled on the seafloor, its coppery scales gleaming</p> <p>A topaz eel darted through a school of yellow tang, its golden body mirroring their color</p> <p>A bootlace worm tangles itself around a piece of driftwood</p> <p>A red-eyed tree frog clings to a leaf with its sticky toe pads</p> <p>The Amazon milk frog inflated its body, trying to appear larger</p> <p>The jaguar’s powerful jaws crushed the turtle’s shell</p> <p>A long clam extends its siphons, drawing in water to filter out food particles</p> <p>A kudu reached up to browse on acacia tree leaves</p> <p>A Pale fox kit playfully wrestles with its sibling outside their den</p> <p>A Cape fox, known for its nocturnal habits, emerges from its den at dusk to begin hunting</p> <p>The moose browsed on the tender bark of a young tree, stripping it with its teeth</p> <p>A crab spider ambushed a bee from its hiding spot in a flower</p> <p>A moon coral’s large, rounded polyps resemble a cluster of full moons</p>                                                                                                                                                                                                                                                                                                                                                                                                                                                                     |
| Physics Laboratory                                                                                                                                                                                                                                                                                                                                                                                                                                                                                                                                                                                                                                                                                                                                                                                                                                                                                                                                                                                                                                                                                                                                                                                                                                                                                                                                                                                                                                                                                                                                                                                                                                                                                                                                                                                                                                                                                                                                                   | Mathematics Class                                                                                                                                                                                                                                                                                                                                                                                                                                                                                                                                                                                                                                                                                                                                                                                                                                                                                                                                                                                                                                                                                                                                                                                                                                                                                                                                                                                                                                                                                                                                                                                                                                                                                                                                                                                                                                                                                                                                                                                                                                                            |
| <p>The researcher measured the sound absorption coefficient of the new acoustic material</p> <p>The acoustician measured the sound reduction index of the window using a pink noise generator</p> <p>He used a sound intensity probe to measure the sound power of the jet engine</p> <p>The researcher uses a ceilometer to determine the height of the cloud base</p> <p>With a steady hand, the chemist uses a capillary tube to load the viscous ionic liquid into the rheometer for flow behavior studies</p> <p>The graduate student intently studies the XPS spectrum, identifying the chemical states of the elements present on the catalyst surface</p> <p>She recorded the data from the oscilloscope in her lab notebook</p> <p>The scientist replaced the filament in the electron gun</p> <p>He carefully positioned the sample in the center of the split-coil magnet</p> <p>The scientist adjusted the settings on the surface plasmon resonance (SPR) instrument</p> <p>The cosmologist carefully positioned the spectrograph, ready to analyze the light from a distant supernova</p> <p>He studies the flow patterns in a porous medium using magnetic resonance imaging</p> <p>The researcher measures the thermal conductivity of a rock sample using a divided bar apparatus</p> <p>The geophysicist uses a Schmidt hammer to test the strength of a rock outcrop</p> <p>The physicist calibrated the radionuclide calibrator for accurate activity measurements of radiopharmaceuticals</p> <p>The scientist adjusted the position of the camera to capture the desired image</p> <p>He measured the wavelength of the light using a spectrometer</p> <p>She calculates the probability of a defective product using quality control data</p> <p>She adjusts the phase shifter to control the interference between the microwave signals</p> <p>The scientist uses a laser thermometer to measure the surface temperature of the material</p> | <p>They create a flow diagram to show the steps in the algorithm</p> <p>He draws a box-and-whisker plot to compare the distributions of different data sets</p> <p>They create a Venn diagram to find the probability of the union of two events</p> <p>She uses the separation of variables technique to solve the partial differential equation</p> <p>He arranges a set of numbered tiles to illustrate the concept of permutations with repetition</p> <p>With a critical eye, she examined the partial dependence plots, assessing the impact of individual features on the model</p> <p>He labels each vertex with a unique letter, making it easier to refer to specific nodes</p> <p>She shades a vertex to indicate it has been visited during a graph traversal</p> <p>He draws a graph with a minimum spanning tree, a subgraph connecting all vertices with the minimum total edge weight</p> <p>He shades the area representing the union of two probability events</p> <p>The statistician carefully folded the large printed graph, ensuring the creases were sharp and the edges aligned</p> <p>The analyst used a highlighter to trace the trend line on the time series plot</p> <p>The statistician used a chalk line to draw a perfectly straight line on the chalkboard, representing the regression equation</p> <p>He leans forward, listening intently to his colleague’s explanation of a new mathematical technique</p> <p>The mathematician creates a Pascal’s triangle, highlighting the connection between combinatorics and binomial coefficients</p> <p>She writes out the formula for calculating the number of combinations of n objects taken r at a time</p> <p>He creates a matrix to represent the adjacency relationships in a combinatorial graph</p> <p>He arranges a set of dominos in different configurations, exploring the number of possible tilings</p> <p>The mathematician draws a tree diagram to illustrate the Collatz conjecture</p> <p>She writes out a proof using mathematical induction, establishing a pattern</p> |
| Musician Performance                                                                                                                                                                                                                                                                                                                                                                                                                                                                                                                                                                                                                                                                                                                                                                                                                                                                                                                                                                                                                                                                                                                                                                                                                                                                                                                                                                                                                                                                                                                                                                                                                                                                                                                                                                                                                                                                                                                                                 |                                                                                                                                                                                                                                                                                                                                                                                                                                                                                                                                                                                                                                                                                                                                                                                                                                                                                                                                                                                                                                                                                                                                                                                                                                                                                                                                                                                                                                                                                                                                                                                                                                                                                                                                                                                                                                                                                                                                                                                                                                                                              |
| <p>The accordionist’s fingers danced across the keys, effortlessly transitioning between notes</p> <p>The man blows into the blowpipe to fill the bag with air</p> <p>The banjo player’s hands moved in a blur, creating an intricate fingerpicking pattern</p> <p>He muted the strings with his palm, creating a staccato effect</p> <p>The bongo player’s hands alternate between drums</p> <p>The cellist leans into the instrument, conveying the emotion of the piece through their posture</p> <p>She brushes the snare drum lightly, creating a soft, sizzling sound</p> <p>Their cheeks puff out as they blow into the mouthpiece</p> <p>She plays the guitar while sitting on a stool</p> <p>He tapped his fingers on the fretboard, creating a percussive rhythm</p> <p>He alternates between blowing and drawing on the harmonica, creating a dynamic sound</p> <p>With closed eyes, the musician swayed gently as they strummed the harp’s delicate strings</p> <p>She gently presses the white keys with her fingertips</p> <p>She places her feet on the pedals and her hands on the keys</p> <p>She smiled at the audience, her saxophone gleaming under the stage lights as she played a upbeat tune</p> <p>He slides his left hand along the strings to change the pitch</p> <p>They play a glissando by sliding their finger across the keys</p> <p>They keep their hands steady for a long, sustained note</p> <p>He tilts the trombone up for a high note</p> <p>The musician’s eyes darted between the sheet music and his fingers, ensuring he played each note correctly</p>                                                                                                                                                                                                                                                                                                                                                                  |                                                                                                                                                                                                                                                                                                                                                                                                                                                                                                                                                                                                                                                                                                                                                                                                                                                                                                                                                                                                                                                                                                                                                                                                                                                                                                                                                                                                                                                                                                                                                                                                                                                                                                                                                                                                                                                                                                                                                                                                                                                                              |

Table 2. Example sentences from each OOD topic.

|                  | Train    |                       |                           | Test     |                       |                           |
|------------------|----------|-----------------------|---------------------------|----------|-----------------------|---------------------------|
|                  | Positive | In-Domain<br>Negative | Out-of-Domain<br>Negative | Positive | In-Domain<br>Negative | Out-of-Domain<br>Negative |
| QVHighlights [2] | 7218     | 7218                  | 7230                      | 1550     | 1550                  | 1550                      |
| Charades-STA [1] | 12404    | 12404                 | 7230                      | 3720     | 3720                  | 1550                      |

Table 3. Numbers of positive and negative queries used for QVHighlights and Charades-STA.

### 3.3. Implementation Details

**UniVTG** For QVHighlights, we use loss weightings of  $\lambda^+ = 1$ ,  $\lambda_{ID}^- = 0.1$ ,  $\lambda_{OOD}^- = 0.1$ , and  $\lambda_p = 1$ , while for Charades-STA, we adjust  $\lambda_{ID}^- = 0.5$ ,  $\lambda_{OOD}^- = 0.5$ . The remaining loss weightings are retained from QVHighlights and Charades-STA training defaults in UniVTG. For negative queries the cosine similarity loss weighting  $\lambda_s^-$  is set equal to the intra video saliency loss weighting.

**QD-DETR** Loss weightings of  $\lambda^+ = 1$ ,  $\lambda_{ID}^- = 0.05$ ,  $\lambda_{OOD}^- = 0.05$ , and  $\lambda_p = 1$  are used for both QVHighlights and Charades-STA. For QVHighlights,  $\lambda_s^- = 1$  while for

Charades-STA,  $\lambda_s^- = 4$ .

**CG-DETR** The same weightings are used as in QD-DETR except  $\lambda_{ID}^- = 0.1$ ,  $\lambda_{OOD}^- = 0.1$  for both datasets. All other loss weightings retain their default values.

### 4. OOD Generalisability

To test the generalisability of the negative-aware approach for OOD query sentences, we test the UniVTG-NA model on OOD sentences from another scenario on which the model has not been trained. This scenario is ‘musician performances’ (see sample sentences in Table 2). The re-

| Method          | QVHighlights   |               |                    |       | Charades-STA   |               |                    |       |
|-----------------|----------------|---------------|--------------------|-------|----------------|---------------|--------------------|-------|
|                 | R1@0.5         | R1@0.7        | Rejection Acc. (%) |       | R1@0.5         | R1@0.7        | Rejection Acc. (%) |       |
|                 |                |               | ID                 | OOD   |                |               | ID                 | OOD   |
| UniVTG [3] SVM  | 63.48 (-3.87)  | 49.87 (-2.78) | 94.77              | 97.74 | 53.47 (-6.75)  | 33.49 (-5.06) | 35.89              | 50.40 |
| CG-DETR [4] SVM | 62.84 (-4.26)  | 50.26 (-3.29) | 95.55              | 95.41 | 43.79 (-13.74) | 28.44 (-7.23) | 82.90              | 74.52 |
| QD-DETR [5] SVM | 48.26 (-13.74) | 37.42 (-8.84) | 96.32              | 95.09 | 46.67 (-12.44) | 30.05 (-6.70) | 76.91              | 81.59 |

Table 4. Results of training an SVM on top of the saliency score outputs of UniVTG, CG-DETR and QD-DETR.

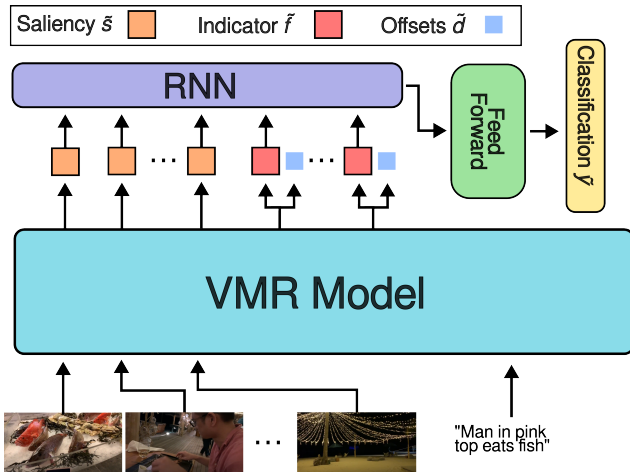

Figure 1. The classification head for QD-DETR-NA and CG-DETR-NA takes as input a concatenation of saliency and indicator scores, which are then passed through a recurrent layer and a feed forward layer before producing a single value output for classification.

rejection accuracy results are shown in Table 5. The rejection accuracy remains high for both datasets, demonstrating that the model is capable of generalising to other OOD scenarios.

| Method    | Rejection Acc. (%) |              |
|-----------|--------------------|--------------|
|           | QVHighlights       | Charades-STA |
| UniVTG-NA | 99.8               | 93.8         |

Table 5. Rejection accuracy results for UniVTG-NA on the unseen OOD category of ‘musician performance’.

## 5. UniMD

To further motivate the need for negative-aware training for the task of Negative-Aware Video Moment Retrieval, we investigate the output produced by UniMD [6], a recent SOTA method which only produces indicator scores with no saliency scores. We plot histograms of the output scores for positive and in-domain negative sentences for Charades-STA and ActivityNet-Captions, as in Figure 2. There is significant overlap between the positive and negative distribu-

tions which shows that the model is not designed to handle negative rejection. This further motivates the need for models which are specifically trained to carry out negative rejection alongside moment retrieval.

## 6. Qualitative Results

We provide further qualitative results from UniVTG-NA on the QVHighlights and Charades-STA datasets in Figure 3 & 4. The model frequently successfully localises the positive sentences and rejects the negative sentences. Failure cases are included in the bottom right of each set of examples. The failure case in Figure 3 is a case of UniVTG-NA rejecting a positive sentence, while in Figure 4 the model fails to reject an ID negative sentence.

## References

- [1] Jiyang Gao, Chen Sun, Zhenheng Yang, and Ram Nevatia. Tall: Temporal activity localization via language query. In *ICCV*, 2017. 1, 3
- [2] Jei Lei, Tamara L. Berg, and Bansal. Qvhighlights: Detecting moments and highlights in videos via natural language queries. In *NeurIPS*, 2021. 1, 3
- [3] Kevin Qinghong Lin, Pengchuan Zhang, Joya Chen, Shraman Pramanick, Difei Gao, Alex Jinpeng Wang, Rui Yan, and Mike Zheng Shou. Univtg: Towards unified video-language temporal grounding. In *ICCV*, 2023. 1, 2, 4
- [4] WonJun Moon, Sangeek Hyun, SuBeen Lee, and Jae-Pil Heo. Correlation-guided query-dependency calibration in video representation learning for temporal grounding. *CoRR abs/2311.08835*, 2024. 1, 4
- [5] WonJun Moon, Sangeek Hyun, SangUk Park, Dongchan Park, and Jae-Pil Heo. Query-dependent video representation for moment retrieval and highlight detection. In *CVPR*, 2023. 1, 4
- [6] Yingsen Zeng, Yujie Zhong, Chengjian Feng, and Lin Ma. Unimd: Towards unifying moment retrieval and temporal action detection. *ECCV*, 2024. 1, 4

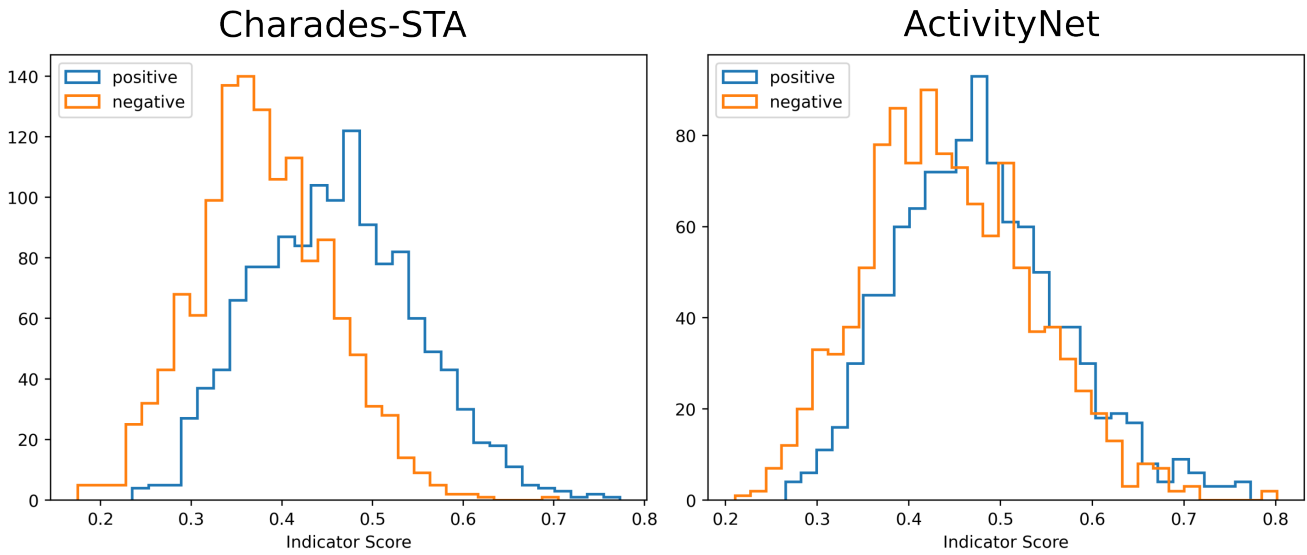

Figure 2. Histograms of prediction (indicator) scores for positive and in-domain negative queries produced by the UniMD model.

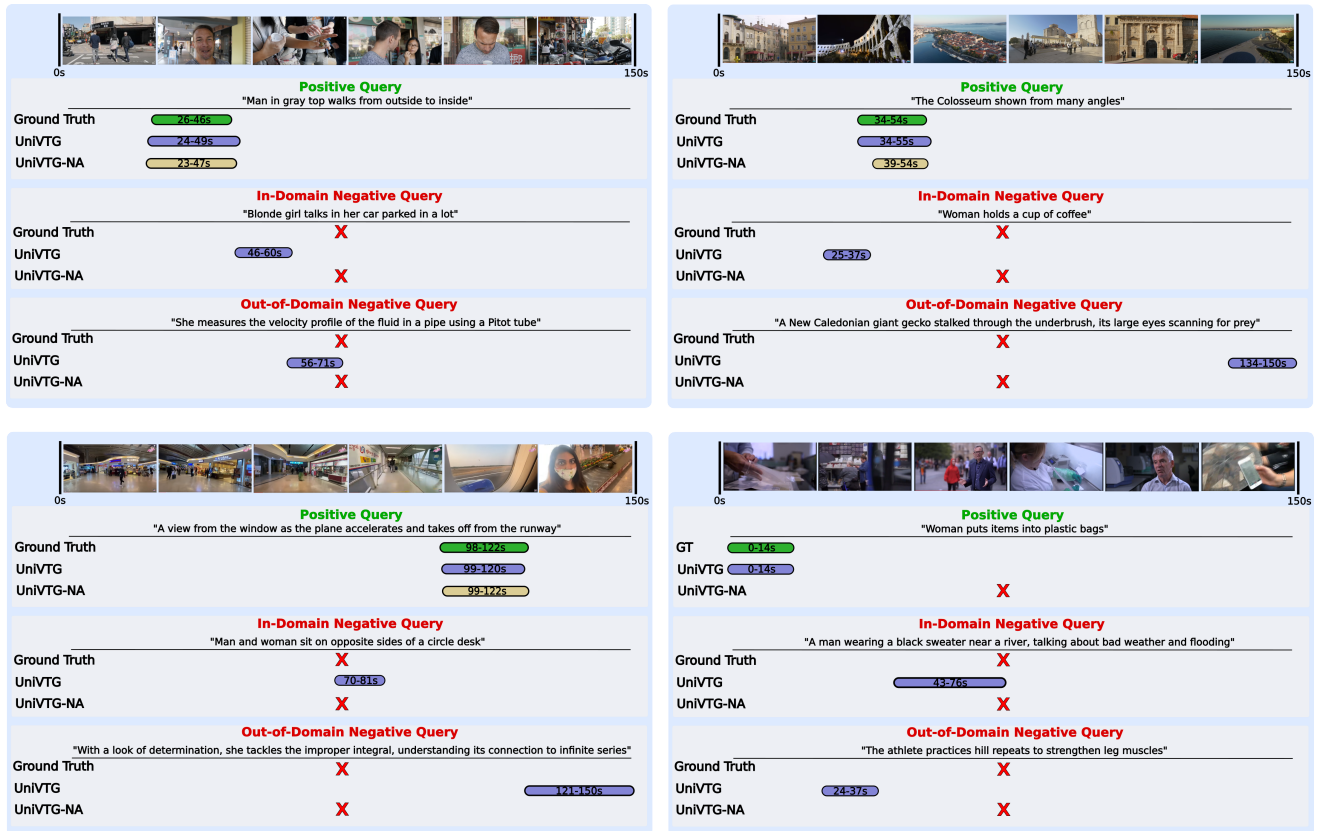

Figure 3. Qualitative results from UniVTG-NA on QVHighlights.

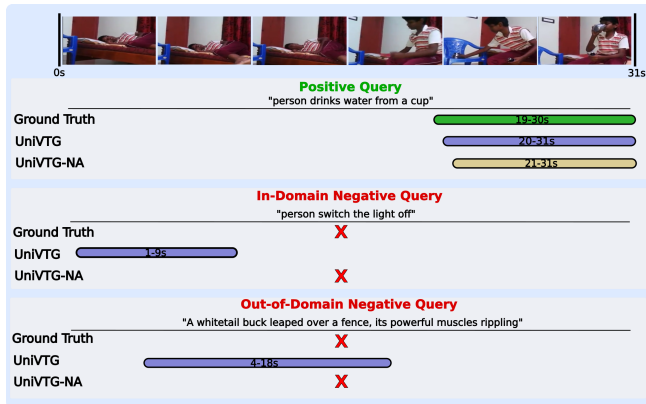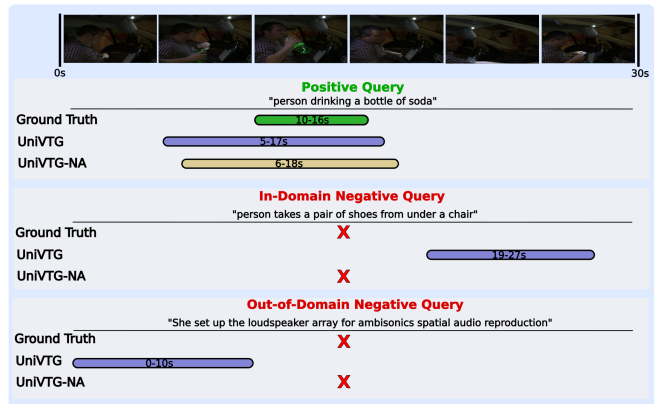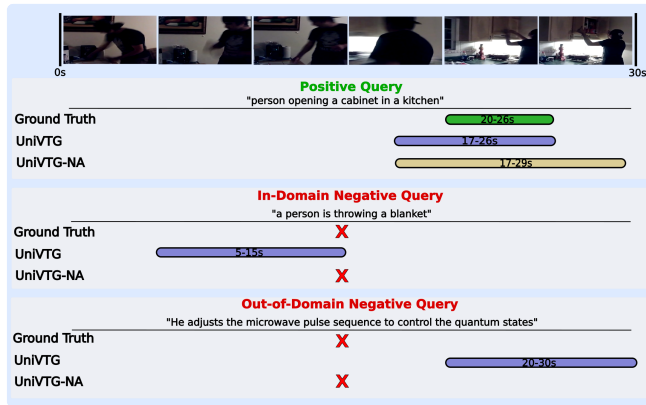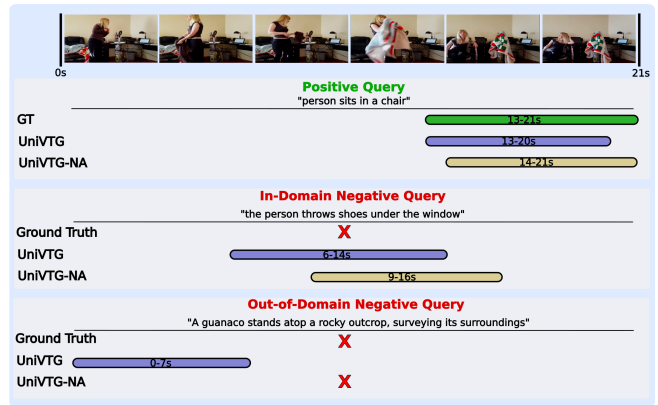

Figure 4. Qualitative results from UniVTG-NA on Charades-STA.
